# Supplementary material for: The Emergence of New Aggressive Leaf Rust Races with the Potential to Supplant the Resistance of Wheat Cultivars
Source: MDPI journal article supplement (doi:10.3390/biology10090925), 2021-09-16
Supplement: s1 [file s1]

# Supplementary materials

Table S1. Pt-code for the 20 differential hosts of *Puccinia triticina* in ordered sets of four and additional set five.

|                      |             | Infection type produced on near isogenic Lr lines |      |      |      |
|----------------------|-------------|---------------------------------------------------|------|------|------|
|                      |             | 1                                                 | 2a   | 2c   | 3    |
| Pt-code <sup>a</sup> | Host set 1: | 1                                                 | 2a   | 2c   | 3    |
|                      | Host set 2: | 9                                                 | 16   | 24   | 26   |
|                      | Host set 3: | 3ka                                               | 11   | 17   | 30   |
|                      | Host set 4: | 10                                                | 18   | 21   | 2b   |
|                      | Host set 5: | 14b                                               | 15   | 36   | 42   |
| B                    |             | Low                                               | Low  | Low  | Low  |
| C                    |             | Low                                               | Low  | Low  | High |
| D                    |             | Low                                               | Low  | High | Low  |
| F                    |             | Low                                               | Low  | High | High |
| G                    |             | Low                                               | High | Low  | Low  |
| H                    |             | Low                                               | High | Low  | High |
| J                    |             | Low                                               | High | High | Low  |
| K                    |             | Low                                               | High | High | High |
| L                    |             | High                                              | Low  | Low  | Low  |
| M                    |             | High                                              | Low  | Low  | High |
| N                    |             | High                                              | Low  | High | Low  |
| P                    |             | High                                              | Low  | High | High |
| Q                    |             | High                                              | High | Low  | Low  |
| R                    |             | High                                              | High | Low  | High |
| S                    |             | High                                              | High | High | Low  |
| T                    |             | High                                              | High | High | High |

<sup>a</sup>Pt-code consists of the designation for set 1 followed by that for set 2, etc. L = Low infection type (avirulent pathogen); H = High infection type (virulent pathogen).

**Table S2. Wheat leaf rust infection types used in disease assessment for seedling stage according to Johnston and Browder [31].**

| <b>Host response (class)</b>  | <b>Infection type</b> | <b>Disease symptoms</b>                                                |
|-------------------------------|-----------------------|------------------------------------------------------------------------|
| <b>Immune</b>                 | 0                     | No uredia or other macroscopic sign of infection.                      |
| <b>Nearly immune</b>          | 0;                    | No uredia but hypersensitive necrotic or chlorotic flecks present.     |
| <b>Very resistant</b>         | 1                     | Small uredia surrounded by necrosis.                                   |
| <b>Moderately resistant</b>   | 2                     | Small to medium uredia surrounded by chlorosis or necrosis.            |
| <b>Moderately susceptible</b> | 3                     | Medium-sized uredia that may be associated with chlorosis.             |
| <b>Very susceptible</b>       | 4                     | Large uredia without chlorosis or necrosis or rarely necrosis.         |
| <b>Heterogeneous</b>          | X                     | Random distribution of different variable sized uredia on single leaf. |

**Table S3. Code, nucleotide sequence and G+C (%) of primers used in the random amplified polymorphic DNA (RAPD) reactions.**

| Primer | Sequence           | (G+C) % |
|--------|--------------------|---------|
| 1      | 5'- GGTGCGGGAA- 3' | 70      |
| 2      | 5'- GTTTCGCTCC- 3' | 60      |
| 3      | 5'- GTAGACCCGT- 3' | 60      |

**Table S4. The pedigree list of the monogenic lines (*Lr* genes) used in this study.**

| No. | <i>Lr</i> gene | Origin of seed resource     |
|-----|----------------|-----------------------------|
| 1   | <i>Lr1</i>     | TC*6/Centenatio (RL6003)    |
| 2   | <i>Lr2a</i>    | TC*6/Webster (RL6016)       |
| 3   | <i>Lr2b</i>    | TC*6/Carine (RL6016)        |
| 4   | <i>Lr2c</i>    | TC*6/Lorous (RL6047)        |
| 5   | <i>Lr3</i>     | TC*6/Democrat (RL6002)      |
| 6   | <i>Lr3ka</i>   | Bage/TC*6 (RL6042)          |
| 7   | <i>Lr9</i>     | Transefer/8*TC (RL6010)     |
| 8   | <i>Lr10</i>    | TC*6/Exchange (RL6004)      |
| 9   | <i>Lr11</i>    | Kussar (W976)               |
| 10  | <i>Lr14b</i>   | TC*6/Maria Escobar (RL6006) |
| 11  | <i>Lr15</i>    | TC*6/Kenya 1483 (RL6052)    |
| 12  | <i>Lr16</i>    | TC*6/Exchange (RL6005)      |
| 13  | <i>Lr17</i>    | Klein Lucero/6*TC (RL6008)  |
| 14  | <i>Lr18</i>    | TC*6/Africa 43 (RL6009)     |
| 15  | <i>Lr19</i>    | TC*7/Tr (RL6040)            |
| 16  | <i>Lr21</i>    | TC*6/RL5406 (RL6043)        |
| 17  | <i>Lr24</i>    | TC*6/Agent (RL6064)         |
| 18  | <i>Lr26</i>    | TC*6/St-1-25 (RL6078)       |
| 19  | <i>Lr28</i>    | CS2D-2M                     |
| 20  | <i>Lr30</i>    | TC*6/Terenz10(RL6049)       |
| 21  | <i>Lr36</i>    | E84018                      |
| 22  | <i>Lr42</i>    | <i>T. tauchii</i>           |

**Table S5. Primer names, sequences, annealing temperatures and references from *Lr* genes associated markers used in this study.**

| Gene        | Name            | Primer sequences (5'-3')   | Annealing temperatures |
|-------------|-----------------|----------------------------|------------------------|
| <i>Lr19</i> | SCS73719-1      | TCG TCC AGA TCA GAA TGT G  | 55                     |
|             | SCS73719-2      | CTC GTCGATTAGCAGTGAG       |                        |
| <i>Lr28</i> | <i>Lr</i> 28-01 | CCC GGC ATA AGT CTA TGG TT | 50                     |
|             | <i>Lr</i> 28-02 | CAA TGA ATG AGA TAC GTG AA |                        |
